# Supplementary material for: Identification of Host Factors Involved in Human Cytomegalovirus Replication, Assembly, and Egress Using a Two-Step Small Interfering RNA Screen
Source: PubMed Central journal article supplement (PMC6020295; doi:10.1128/mbio.00716-18), 2018-06-26
Supplement: mbo003183951st1.pdf [file mbo003183951st1.pdf]

A

| Gene     | PR   | Fold change | Std dev | Description                                                                                         |
|----------|------|-------------|---------|-----------------------------------------------------------------------------------------------------|
| PHK2B    | -0.3 | 0.45        | 0.45    | Phosphatidylinositol 4-kinase type 2 beta                                                           |
| VCP      | -0.3 | 0.70        | -0.25   | Valosin containing protein                                                                          |
| FYN      | -4.1 | 1.96        | 0.10    | FYN proto-oncogene, Src family tyrosine kinase                                                      |
| SNAP1    | -0.6 | 0.31        | 0.30    | Synaptonemal-associated protein, 31kDa                                                              |
| RAB11B   | -0.2 | 0.24        | 0.18    | RAB11, member RAS oncogene family                                                                   |
| DAB2     | -3.1 | 0.38        | 0.30    | Dab, mitogen-responsive phosphoprotein, homolog 2 (Drosophila)                                      |
| ITSN2    | -3.1 | 0.27        | 0.28    | Intersectin 2                                                                                       |
| CRUB1    | -0.1 | 0.21        | 0.37    | CRUB1 proto-oncogene, E3 ubiquitin protein ligase                                                   |
| VPS36    | -3.0 | 0.30        | 0.30    | Vacuolar protein sorting 36 homolog (S. cerevisiae)                                                 |
| PAK1     | -2.8 | 0.55        | 0.21    | p21 protein (Cdc42/Rac)-activated kinase 1                                                          |
| PACSN3   | -2.7 | 1.18        | 0.00    | Protein kinase C and casein kinase substrate in neurons 3                                           |
| AP2A1    | -2.5 | 0.00        | 0.00    | Adaptor-related protein complex 2, alpha 1 subunit                                                  |
| FASN     | -2.5 | 1.49        | 0.00    | Fatty acid synthase                                                                                 |
| ARPC3    | -2.4 | 0.02        | 0.02    | Actin related protein 2/3 complex, subunit 3, 21kDa                                                 |
| ARRB1    | -2.4 | 0.10        | 0.10    | Arrestin, beta 1                                                                                    |
| CTBP1    | -2.4 | 1.01        | 0.00    | C-terminal binding protein 1                                                                        |
| PHK8     | -2.4 | 0.36        | 0.36    | Phosphatidylinositol 4-kinase, catalytic, beta                                                      |
| EPH5L1   | -2.4 | 0.19        | 0.19    | Epidermal growth factor receptor pathway substrate 15-like 1                                        |
| RAB8B    | -2.4 | 1.60        | 0.00    | RAB8B, member RAS oncogene family                                                                   |
| AP2E1    | -2.3 | 0.06        | 0.06    | Adaptor-related protein complex 4, epsilon 1 subunit                                                |
| PRK01    | -2.3 | 0.84        | 0.00    | Protein kinase D1                                                                                   |
| CB1      | -2.2 | 0.20        | 0.20    | Calcium and integrin binding 1 (calmyrin)                                                           |
| CDC42    | -2.1 | 0.04        | 0.04    | Cell division cycle 42                                                                              |
| CAV2     | -2.0 | 0.23        | 0.23    | Caveolin 2                                                                                          |
| HIP1     | -2.0 | 0.16        | 0.16    | Huntingtin interacting protein 1                                                                    |
| COPB2    | -2.0 | 0.25        | 0.25    | Coatomer protein complex, subunit beta 2 (beta prime)                                               |
| WASF3    | -2.0 | 0.55        | 0.55    | WAS protein family, member 3                                                                        |
| AP2A2    | -2.0 | 0.04        | 0.04    | Adaptor-related protein complex 2, alpha 2 subunit                                                  |
| PHK2C    | -2.0 | 0.03        | 0.03    | Phosphatidylinositol 4-phosphate 3-kinase, catalytic subunit type 2 gamma                           |
| PITPNM1  | -1.9 | 0.12        | 0.12    | Phosphatidylinositol transfer protein, membrane-associated 1                                        |
| MAPKBP2  | -1.9 | 0.49        | 0.49    | Mitogen-activated protein kinase 8 interacting protein 2                                            |
| ARF3     | -1.9 | 0.03        | 0.03    | ADP-ribosylation factor 3                                                                           |
| AP1B1    | -1.9 | 0.08        | 0.08    | Adaptor-related protein complex 1, beta 1 subunit                                                   |
| SH3GLB1  | -1.9 | 0.08        | 0.08    | SH3-domain GRB2-like endophilin B1                                                                  |
| CLNT1    | -1.8 | 0.13        | 0.13    | Clathrin interactor 1                                                                               |
| GNB2L1   | -1.8 | 0.01        | 0.01    | Guanine nucleotide binding protein (G protein), beta polypeptide 2-like 1                           |
| RCC1     | -1.8 | 0.02        | 0.02    | Rho-associated, coiled-coil containing protein kinase 2                                             |
| ATP9VA1  | -1.8 | 0.20        | 0.20    | ATPase, H+ transporting, lysosomal V0 subunit 1                                                     |
| ITSN1    | -1.8 | 0.27        | 0.27    | Intersectin 1 (SH3 domain protein)                                                                  |
| RAB8B    | -1.8 | 0.20        | 0.20    | RAB8B, member RAS oncogene family                                                                   |
| CLTA     | -1.8 | 0.17        | 0.17    | Clathrin, light chain A                                                                             |
| CLB      | -1.7 | 0.32        | 0.32    | Clb proto-oncogene, E3 ubiquitin protein ligase                                                     |
| VAMP1    | -1.7 | 0.29        | 0.29    | Vesicle-associated membrane protein 1 (synaptobrevin 1)                                             |
| TNK      | -1.7 | 0.26        | 0.26    | TRAF2 and NCK interacting kinase                                                                    |
| RAB1A    | -1.7 | 0.04        | 0.04    | RAB1A, member RAS oncogene family                                                                   |
| WASF2    | -1.7 | 0.10        | 0.10    | WAS protein family, member 2                                                                        |
| HGS      | -1.7 | 0.03        | 0.03    | Hepatocyte growth factor-regulated tyrosine kinase substrate                                        |
| PRK3     | -1.7 | 0.18        | 0.18    | Inositol hexakisphosphate kinase 3                                                                  |
| ATG5     | -1.6 | 0.16        | 0.16    | Autophagy related 5                                                                                 |
| EPN2     | -1.6 | 0.07        | 0.07    | Epsin 2                                                                                             |
| COPA     | -1.6 | 0.07        | 0.07    | Coatomer protein complex, subunit alpha                                                             |
| ASAP2    | -1.6 | 0.37        | 0.37    | AHGAP with SH3 domain, ankyrin repeat and PH domain 2                                               |
| PHF1A    | -1.6 | 0.03        | 0.03    | Phosphatidylinositol 4-phosphate 5-kinase, type I, alpha                                            |
| DNM1     | -1.6 | 0.04        | 0.04    | Dynamitin 1                                                                                         |
| EPN1     | -1.5 | 0.16        | 0.16    | Epsin 1                                                                                             |
| MAP1LC3A | -1.5 | 0.12        | 0.12    | Microtubule-associated protein 1 light chain 3 alpha                                                |
| ATM      | -1.5 | 0.20        | 0.20    | ATM serine/threonine kinase                                                                         |
| RAB11A   | -1.5 | 0.04        | 0.04    | RAB11, member RAS oncogene family                                                                   |
| ATP9VC   | -1.5 | 0.10        | 0.10    | ATPase, H+ transporting, lysosomal 16kDa, V0 subunit c                                              |
| HIP1R    | -1.5 | 0.31        | 0.31    | Huntingtin interacting protein 1 related                                                            |
| PDCD6P   | -1.5 | 0.15        | 0.15    | Programmed cell death 6 interacting protein                                                         |
| DAPF1    | -1.5 | 0.03        | 0.03    | Diaphanous-related formin 1                                                                         |
| VAV2     | -1.5 | 0.12        | 0.12    | VAV 2 guanine nucleotide exchange factor                                                            |
| WAS      | -1.5 | 0.04        | 0.04    | Wiskott-Aldrich syndrome                                                                            |
| ARPC1B   | -1.4 | 0.12        | 0.12    | Actin related protein 2/3 complex, subunit 1B, 41kDa                                                |
| VAVP     | -1.4 | 0.17        | 0.17    | VAMP (vesicle-associated membrane protein)-associated protein B and C                               |
| EZR      | -1.4 | 0.27        | 0.27    | Ezrin                                                                                               |
| SYNJ1    | -1.4 | 0.14        | 0.14    | Synaptojanin 1                                                                                      |
| MAP4K2   | -1.4 | 0.07        | 0.07    | Mitogen-activated protein kinase kinase kinase kinase 2                                             |
| CLF1     | -1.4 | 0.42        | 0.42    | Cofilin 1 (non-muscle)                                                                              |
| RAB2A    | -1.4 | 0.04        | 0.04    | RAB2A, member RAS oncogene family                                                                   |
| RAC1     | -1.4 | 0.24        | 0.24    | RAS-related C3 botulinum toxin substrate 1 (Rho family, small GTP binding protein Rac1)             |
| ARF6     | -1.4 | 0.16        | 0.16    | ADP-ribosylation factor 6                                                                           |
| EFS      | -1.4 | 0.16        | 0.16    | Embryonal Fyn-associated substrate                                                                  |
| RAB5C    | -1.3 | 0.05        | 0.05    | RAB5C, member RAS oncogene family                                                                   |
| ACACA    | -1.3 | 0.09        | 0.09    | Acetyl-CoA carboxylase alpha                                                                        |
| AP2M1    | -1.3 | 0.09        | 0.09    | Adaptor-related protein complex 2, mu 1 subunit                                                     |
| CR2      | -1.3 | 0.27        | 0.27    | Calcium and integrin binding family member 2                                                        |
| RAB8B    | -1.3 | 0.17        | 0.17    | RAB8B, member RAS oncogene family                                                                   |
| CLBC     | -1.3 | 0.03        | 0.03    | Clb proto-oncogene, E3 ubiquitin protein ligase                                                     |
| ARF1     | -1.3 | 0.02        | 0.02    | ADP-ribosylation factor 1                                                                           |
| CAMK1    | -1.3 | 0.06        | 0.06    | Calcium/calmodulin-dependent protein kinase 1                                                       |
| VAMP2    | -1.3 | 0.11        | 0.11    | Vesicle-associated membrane protein 2 (synaptobrevin 2)                                             |
| PHK4     | -1.3 | 0.01        | 0.01    | Phosphatidylinositol 4-kinase, catalytic, alpha                                                     |
| EPN3     | -1.3 | 0.01        | 0.01    | Epsin 3                                                                                             |
| SREBF1   | -1.3 | 0.31        | 0.31    | Sterol regulatory element binding transcription factor 1                                            |
| RAB8A    | -1.3 | 0.08        | 0.08    | RAB8A, member RAS oncogene family                                                                   |
| PK3CG    | -1.3 | 0.01        | 0.01    | Phosphatidylinositol 4,5-bisphosphate 3-kinase, catalytic subunit gamma                             |
| NEDD4    | -1.2 | 0.19        | 0.19    | Neural precursor cell expressed, developmentally down-regulated 4, E3 ubiquitin protein ligase      |
| MAPKBP1  | -1.2 | 0.15        | 0.15    | Mitogen-activated protein kinase 8 interacting protein 1                                            |
| CAV1     | -1.2 | 0.06        | 0.06    | Caveolin 1                                                                                          |
| ARF5     | -1.2 | 0.10        | 0.10    | ADP-ribosylation factor 5                                                                           |
| SYNJ2    | -1.2 | 0.04        | 0.04    | Synaptojanin 2                                                                                      |
| AP1M1    | -1.2 | 0.04        | 0.04    | Adaptor-related protein complex 1, mu 1 subunit                                                     |
| RAB8B    | -1.2 | 0.15        | 0.15    | RAB8B, member RAS oncogene family                                                                   |
| SH3GLB2  | -1.2 | 0.15        | 0.15    | SH3-domain GRB2-like endophilin B2                                                                  |
| CB3      | -1.2 | 0.09        | 0.09    | Calcium and integrin binding family member 3                                                        |
| SECN1    | -1.2 | 0.11        | 0.11    | Beclin 1, autophagy related                                                                         |
| SNX1     | -1.2 | 0.12        | 0.12    | Sorting nexin 1                                                                                     |
| RAB8A    | -1.2 | 0.08        | 0.08    | RAB8A, member RAS oncogene family                                                                   |
| RAB8A    | -1.2 | 0.08        | 0.08    | RAB8A, member RAS oncogene family                                                                   |
| ADAM10   | -1.2 | 0.19        | 0.19    | ADAM metalloprotease domain 10                                                                      |
| CAV1     | -1.2 | 0.06        | 0.06    | Caveolin 1, caveolae protein, 22kDa                                                                 |
| VAPA     | -1.2 | 0.12        | 0.12    | VAMP (vesicle-associated membrane protein)-associated protein A, 33kDa                              |
| GRB2     | -1.1 | 0.03        | 0.03    | Growth factor receptor-bound protein 2                                                              |
| SAR1A    | -1.1 | 0.09        | 0.09    | Secretion associated, RAS related GTPase 1A                                                         |
| SEC13    | -1.1 | 0.07        | 0.07    | SEC13 homolog (S. cerevisiae)                                                                       |
| PACSN1   | -1.1 | 0.03        | 0.03    | Protein kinase C and casein kinase substrate in neurons 1                                           |
| SYT2     | -1.1 | 0.12        | 0.12    | Synaptojanin II                                                                                     |
| ACTR3    | -1.1 | 0.07        | 0.07    | ARF3 actin-related protein 3 homolog (yeast)                                                        |
| RAB8A    | -1.1 | 0.03        | 0.03    | RAB8A, member RAS oncogene family                                                                   |
| EEA1     | -1.1 | 0.06        | 0.06    | Early endosome antigen 1                                                                            |
| RAB29    | -1.1 | 0.01        | 0.01    | RAB29, member RAS oncogene family                                                                   |
| BIN1     | -1.1 | 0.08        | 0.08    | Bridging integrator 1                                                                               |
| ARPC4    | -1.0 | 0.05        | 0.05    | Actin related protein 2/3 complex, subunit 4, 20kDa                                                 |
| ARPC2    | -1.0 | 0.00        | 0.00    | Actin related protein 2/3 complex, subunit 5, 18kDa                                                 |
| WASF1    | -1.0 | 0.51        | 0.51    | WAS protein family, member 1                                                                        |
| DNM2     | -1.0 | 0.16        | 0.16    | Dynamitin 2                                                                                         |
| ACTR2    | -1.0 | 0.16        | 0.16    | ARF2 actin-related protein 2 homolog (yeast)                                                        |
| CRB1     | -1.0 | 0.60        | 0.60    | CRB1 molecule                                                                                       |
| CLTB     | 0.0  | 1.52        | 1.52    | Clathrin, light chain B                                                                             |
| ARRB2    | 0.0  | 1.57        | 1.57    | Arrestin, beta 2                                                                                    |
| NSF      | 0.0  | 1.48        | 1.48    | N-ethylmaleimide-sensitive factor                                                                   |
| CLTC     | 0.0  | 0.44        | 0.44    | Clathrin, heavy chain (Hc)                                                                          |
| ATG12    | 0.0  | 1.49        | 1.49    | Autophagy related 12                                                                                |
| ARPC1    | 0.0  | 1.46        | 1.46    | Adaptor-related protein complex 3, delta 1 subunit                                                  |
| EPN3     | 0.0  | 1.50        | 1.50    | ELKS/RAB6-interacting/CAST family member 1                                                          |
| MAPKBP3  | 0.0  | 1.54        | 1.54    | Mitogen-activated protein kinase 8 interacting protein 3                                            |
| PHK2A    | 0.0  | 1.64        | 1.64    | Phosphatidylinositol 4-kinase type 2 alpha                                                          |
| SNX2     | 0.1  | 1.64        | 1.64    | Sorting nexin 2                                                                                     |
| EPH5     | 0.1  | 1.62        | 1.62    | Epidermal growth factor receptor pathway substrate 15                                               |
| AP1M2    | 0.1  | 0.05        | 0.05    | Adaptor-related protein complex 1, mu 2 subunit                                                     |
| AMPH     | 1.1  | 0.05        | 0.05    | Amphiphysin                                                                                         |
| LMK1     | 1.1  | 0.05        | 0.05    | LIM domain kinase 1                                                                                 |
| DNM3     | 1.1  | 0.03        | 0.03    | Dynamitin 3                                                                                         |
| VPS4A    | 1.1  | 0.03        | 0.03    | Vacuolar protein sorting 4 homolog A (S. cerevisiae)                                                |
| ARFP2    | 1.1  | 0.03        | 0.03    | ADP-ribosylation factor interacting protein 2                                                       |
| ARPC2    | 1.1  | 0.01        | 0.01    | Actin related protein 2/3 complex, subunit 2, 34kDa                                                 |
| GORASP1  | 1.1  | 0.00        | 0.00    | Golgi reassembly stacking protein 1, 65kDa                                                          |
| RAB3A    | 1.1  | 0.04        | 0.04    | RAB3A, member RAS oncogene family                                                                   |
| SYT1     | 1.1  | 0.04        | 0.04    | Synaptojanin I                                                                                      |
| STAU1    | 1.2  | 0.01        | 0.01    | Staufen double-stranded RNA binding protein 1                                                       |
| CYTH3    | 1.2  | 0.11        | 0.11    | Cytohesin 3                                                                                         |
| RAB11FP5 | 1.2  | 0.01        | 0.01    | RAB11 family interacting protein 5 (class I)                                                        |
| TSG101   | 1.2  | 0.10        | 0.10    | Tumor susceptibility 101                                                                            |
| RAB7B    | 1.3  | 0.01        | 0.01    | RAB7B, member RAS oncogene family                                                                   |
| GTI1     | 1.3  | 0.08        | 0.08    | G protein-coupled receptor kinase interacting AHGAP 1                                               |
| NEDDL3   | 1.3  | 0.01        | 0.01    | Neural precursor cell expressed, developmentally down-regulated 4-like, E3 ubiquitin protein ligase |
| RAB8     | 1.3  | 0.06        | 0.06    | RAB8, member RAS oncogene family                                                                    |
| RHOA     | 1.3  | 0.06        | 0.06    | RAS homolog family member A                                                                         |
| RAB3D    | 1.3  | 0.00        | 0.00    | RAB3D, member RAS oncogene family                                                                   |
| PCALM    | 1.5  | 0.07        | 0.07    | Phosphatidylinositol binding clathrin assembly protein                                              |
| CLTC1    | 1.5  | 0.11        | 0.11    | Clathrin, heavy chain 1                                                                             |
| RAB3C    | 1.5  | 0.11        | 0.11    | RAB3C, member RAS oncogene family                                                                   |
| AP2B1    | 1.6  | 0.05        | 0.05    | Adaptor-related protein complex 2, beta 1 subunit                                                   |
| ROCK1    | 1.6  | 0.02        | 0.02    | Rho-associated, coiled-coil containing protein kinase 1                                             |

B

| Gene     | PR   | Fold change | Std dev | VP   | Description                                                                             |
|----------|------|-------------|---------|------|-----------------------------------------------------------------------------------------|
| VCP      | -4.3 | 0.70        | -0.25   | 0.49 | Valosin containing protein                                                              |
| COPB2    | -2.0 | 0.25        | -0.23   | 0.30 | Coatomer protein complex, subunit beta 2 (beta prime)                                   |
| ATP9VC   | -1.5 | 0.10        | -0.23   | 0.34 | ATPase, H+ transporting, lysosomal 16kDa, V0 subunit c                                  |
| COPA     | -1.4 | 0.37        | -0.24   | 0.44 | Coatomer protein complex, subunit alpha                                                 |
| ERC1     | 0.0  | 1.50        | -0.13   | 0.30 | ELKS/RAB6-interacting/CAST family member 1                                              |
| VPS36    | -3.0 | 0.30        | -0.10   | 0.18 | Vacuolar protein sorting 36 homolog (S. cerevisiae)                                     |
| PK3CG    | -2.0 | 0.83        | -0.4    | 0.34 | Phosphatidylinositol 4-phosphate 3-kinase, catalytic subunit type 2 gamma               |
| ASAP2    | -1.6 | 0.37        | -0.45   | 0.45 | AHGAP with SH3 domain, ankyrin repeat and PH domain 2                                   |
| FYN      | -4.1 | 1.96        | -0.18   | 0.79 | FYN proto-oncogene, Src family tyrosine kinase                                          |
| RAB4B    | 1.3  | 0.37        | -0.7    | 2.29 | RAB4B, member RAS oncogene family                                                       |
| ITSN1    | -1.8 | 0.27        | -0.9    | 2.09 | Intersectin 1 (SH3 domain protein)                                                      |
| DAB2     | -3.1 | 0.38        | -2.8    | 2.49 | Dab, mitogen-responsive phosphoprotein, homolog 2 (Drosophila)                          |
| VPS4A    | 1.1  | 0.01        | -0.4    | 0.71 | Vacuolar protein sorting 4 homolog A (S. cerevisiae)                                    |
| WASF3    | -2.0 | 0.55        | -0.1    | 0.81 | WAS protein family, member 3                                                            |
| ATM      | -1.5 | 0.20        | -0.7    | 0.82 | ATM serine/threonine kinase                                                             |
| ATG5     | -1.6 | 0.16        | -0.6    | 0.96 | Autophagy related 5                                                                     |
| CLINT1   | -1.8 | 0.13        | -0.8    | 0.60 | Clathrin interactor 1                                                                   |
| AP1M1    | -1.2 | 0.04        | -0.2    | 1.61 | Adaptor-related protein complex 1, mu 1 subunit                                         |
| ARRB1    | -2.4 | 0.10        | -0.6    | 0.58 | Arrestin, beta 1                                                                        |
| BIN1     | -1.1 | 0.08        | -0.7    | 0.72 | Bridging integrator 1                                                                   |
| CLB      | -3.1 | 0.17        | -0.6    | 0.76 | Clb proto-oncogene, E3 ubiquitin protein ligase                                         |
| RAB11A   | -1.5 | 0.04        | -0.4    | 1.55 | RAB11A, member RAS oncogene family                                                      |
| RAC1     | -1.4 | 0.24        | -0.3    | 2.01 | RAS-related C3 botulinum toxin substrate 1 (Rho family, small GTP binding protein Rac1) |
| ARRB2    | -2.0 | 0.17        | -0.6    | 1.57 | Arrestin, beta 2                                                                        |
| PHK2B    | -0.3 | 0.45        | -0.8    | 0.94 | Phosphatidylinositol 4-kinase type 2 beta                                               |
| SH3GLB1  | -1.9 | 0.08        | -0.6    | 0.91 | SH3-domain GRB2-like endophilin B1                                                      |
| RAB6A    | -1.2 | 0.08        | -0.5    | 1.09 | RAB6A, member RAS oncogene family                                                       |
| SAR1A    | -1.1 | 0.09        | -0.5    | 0.31 | Secretion associated, RAS related GTPase 1A                                             |
| SNAP1    | -3.4 | 0.13        | -0.2    | 0.48 | Synaptonemal-associated protein, 31kDa                                                  |
| SYNJ2    | -1.2 | 0.04        | -0.2    | 0.69 | Synaptojanin 2                                                                          |
| EPN2     | -1.6 | 0.07        | -1.2    | 1.26 | Epsin 2                                                                                 |
| PIPK1A   | -1.6 | 0.03        | -1.9    | 0.54 | Phosphatidylinositol 4-phosphate 5-kinase, type I, alpha                                |
| CLTB     | -0.1 | 0.62        | -1.7    | 0.62 | Clathrin, light chain B                                                                 |
| ARF3     | -1.9 | 0.03        | -1.7    | 0.50 | ADP-ribosylation factor 3                                                               |
| AP2A1    | -2.5 | 0.00        | -1.7    | 0.19 | Adaptor-related protein complex 2, alpha 1 subunit                                      |
| RAB8B    | -2.4 | 1.60        | -1.7    | 3.86 | RAB8B, member RAS oncogene family                                                       |
| EPN1     | -1.5 | 0.16        | -1.6    | 0.8  | Epsin 1                                                                                 |
| RAB5C    | -1.3 | 0.05        | -1.6    | 0.08 | RAB5C, member RAS oncogene family                                                       |
| GNB2L1   | -1.8 | 0.01        | -1.6    | 0.51 | Guanine nucleotide binding protein (G protein), beta polypeptide 2-like 1               |
| WASF2    | -1.7 | 0.10        | -1.5    | 0.67 | WAS protein family, member 2                                                            |
| CLTC     | -1.7 | 0.17        | -1.5    | 0.34 | Clathrin/calmodulin-dependent protein kinase 1                                          |
| RAB1A    | -1.7 | 0.02        | -1.5    | 0.10 | RAB1A, member RAS oncogene family                                                       |
| RAB11FP5 | 1.2  | 0.04        | -1.5    | 0.18 | RAB11 family interacting protein 5 (class I)                                            |
| CLTC     | 0.0  | 1.47        | -1.4    | 0.38 | Clathrin, heavy chain (Hc)                                                              |
| RAB8B    | -1.3 | 0.17        | -1.3    | 0.69 | RAB8B, member RAS oncogene family                                                       |
| EFS      | -1.4 | 0.16        | -1.3    | 0.34 | Embryonal Fyn-associated substrate                                                      |
| CD81     | -0.1 | 1.80        | -1.3    | 0.15 | CD81 molecule                                                                           |
| ARF5     | -1.2 | 0.10        | -1.1    | 0.01 | ADP-ribosylation factor 5                                                               |
| ADAM10   | -1.2 | 0.19        | -1.0    | 3.22 | ADAM metalloprotease domain 10                                                          |
| MAPKBP2  | -1.9 | 0.49        | -0.6    | 2.67 | Mitogen-activated protein kinase 8 interacting protein 2                                |
| DNM1     | -1.6 | 0.04        | -0.4    | 1.97 | Dynamitin 1                                                                             |
| ARF1     | -1.3 | 0.02        | -0.2    | 1.71 | ADP-ribosylation factor 1                                                               |
| RAB3A    | -1.4 | 0.04        | -0.1    | 1.73 | RAB3A, member RAS oncogene family                                                       |
| RAB3A    | 1.1  | 0.04        | -0.1    | 1.63 | RAB3A, member RAS oncogene family                                                       |
| PACSN3   | -2.7 | 1.18        | -0.1    | 2.65 | Protein kinase C and casein kinase substrate in neurons 3                               |
| CLTA     | -1.8 | 0.17        | -0.1    | 1.66 | Clathrin, light chain A                                                                 |
| VAV2     | -1.5 | 0.12        | 0.0     | 1.49 | VAV 2 guanine nucleotide exchange factor                                                |
| SV       |      |             |         |      |                                                                                         |
