# Supplementary material for: Identification of Host Factors Involved in Human Cytomegalovirus Replication, Assembly, and Egress Using a Two-Step Small Interfering RNA Screen
Source: PubMed Central journal article supplement (PMC6020295; doi:10.1128/mbio.00716-18), 2018-06-26
Supplement: mbo003183951st2.pdf [file mbo003183951st2.pdf]

| Gene      | PR          |         | VP          |         | Description                                                                                         |
|-----------|-------------|---------|-------------|---------|-----------------------------------------------------------------------------------------------------|
|           | Fold change | Std dev | Fold change | Std dev |                                                                                                     |
| VAMP2     | -1.3        | 0.11    | 2.9         | 0.53    | Vesicle-associated membrane protein 2 (synaptobrevin 2)                                             |
| ROCK1     | 1.6         | 0.22    | 2.8         | 0.29    | Rho-associated, coiled-coil containing protein kinase 1                                             |
| SHOGLB2   | -1.2        | 0.15    | 2.8         | 0.58    | SH3-domain GRB2-like endophilin B2                                                                  |
| EPB15     | 0.1         | 1.62    | 2.7         | 0.48    | Epidermal growth factor receptor pathway substrate 15                                               |
| RAB2C     | 1.5         | 0.11    | 2.6         | 0.59    | RAB2C, member RAS oncogene family                                                                   |
| AP2B1     | 1.6         | 0.05    | 2.6         | 0.55    | Adaptor-related protein complex 2, beta 1 subunit                                                   |
| DIAPH1    | -1.5        | 0.01    | 2.6         | 0.45    | Diaphanous-related formin 1                                                                         |
| RAB29     | -1.1        | 0.01    | 2.6         | 0.59    | RAB29, member RAS oncogene family                                                                   |
| MAPK9B1   | -1.2        | 0.15    | 2.5         | 0.42    | Mitogen-activated protein kinase 8 interacting protein 1                                            |
| ROCK2     | -1.8        | 0.27    | 2.5         | 0.45    | Rho-associated, coiled-coil containing protein kinase 2                                             |
| AMPH      | 1.1         | 0.05    | 2.5         | 0.50    | Amphiphysin                                                                                         |
| RAB20     | 1.3         | 0.00    | 2.5         | 0.39    | RAB20, member RAS oncogene family                                                                   |
| GRB2      | -1.1        | 0.03    | 2.5         | 0.61    | Growth factor receptor-bound protein 2                                                              |
| DNM3      | 1.1         | 0.03    | 2.5         | 0.63    | Dynamins 3                                                                                          |
| ARF6      | -1.4        | 0.16    | 2.5         | 0.36    | ADP-ribosylation factor 6                                                                           |
| WASF1     | -0.3        | 1.91    | 2.5         | 1.12    | WAS protein family, member 1                                                                        |
| RHOA      | 1.3         | 0.06    | 2.5         | 0.35    | RAS homolog family member A                                                                         |
| SYT2      | -1.1        | 0.12    | 2.5         | 0.27    | Synaptotagmin II                                                                                    |
| ACTR3     | -1.1        | 0.07    | 2.4         | 0.53    | ARF3 activator-related protein 3 homolog (yeast)                                                    |
| CYTH3     | 1.2         | 0.11    | 2.4         | 0.46    | Cytohesin 3                                                                                         |
| TSG101    | 1.2         | 0.10    | 2.4         | 0.47    | Tumor susceptibility 101                                                                            |
| ATG12     | 0.0         | 1.49    | 2.4         | 0.38    | Autophagy related 12                                                                                |
| ACTR2     | -0.1        | 1.60    | 2.4         | 0.28    | ARF2 activator-related protein 2 homolog (yeast)                                                    |
| RAB7B     | 1.3         | 0.01    | 2.4         | 0.29    | RAB7B, member RAS oncogene family                                                                   |
| RAB11B    | -3.2        | 0.24    | 2.3         | 0.41    | RAB11B, member RAS oncogene family                                                                  |
| ARPC1B    | -1.4        | 0.12    | 2.3         | 0.56    | Actin related protein 2/3 complex, subunit 1B, 41kDa                                                |
| CEB3      | -1.2        | 0.09    | 2.3         | 0.43    | Calcium and integrin binding family member 3                                                        |
| PHK2A     | 0.0         | 1.64    | 2.3         | 0.66    | Phosphatidylinositol 4-kinase type 2 alpha                                                          |
| PKC3C     | -1.3        | 0.01    | 2.3         | 0.37    | Phosphatidylinositol-4,5-bisphosphate 3-kinase, catalytic subunit gamma                             |
| EEA1      | -1.1        | 0.08    | 2.3         | 0.40    | Early endosome antigen 1                                                                            |
| VAMP1     | -1.7        | 0.29    | 2.2         | 0.48    | Vesicle-associated membrane protein 1 (synaptobrevin 1)                                             |
| VAPA      | -0.1        | 1.12    | 2.2         | 0.10    | VAMP (vesicle-associated membrane protein)-associated protein A, 33kDa                              |
| SNX2      | 0.1         | 1.64    | 2.2         | 0.07    | Sorting nexin 2                                                                                     |
| RAB3B     | -1.2        | 0.08    | 2.2         | 0.16    | RAB3B, member RAS oncogene family                                                                   |
| ATP9VD1   | -1.8        | 0.20    | 2.2         | 0.50    | ATPase, H+ transporting, lysosomal V0 subunit a1                                                    |
| BECN1     | -1.2        | 0.11    | 2.1         | 0.41    | Becclin 1, autophagy related                                                                        |
| CLTCL1    | 1.5         | 0.07    | 2.1         | 0.22    | Clahtin, heavy chain-like 1                                                                         |
| PHKA      | -1.3        | 0.01    | 2.1         | 0.27    | Phosphatidylinositol 4-kinase, catalytic, alpha                                                     |
| PHKB      | -2.4        | 0.36    | 2.1         | 0.55    | Phosphatidylinositol 4-kinase, catalytic, beta                                                      |
| NEED4     | -1.2        | 0.19    | 2.1         | 0.09    | Neural precursor cell expressed, developmentally down-regulated 4, E3 ubiquitin protein ligase      |
| CDK2      | -2.1        | 0.06    | 2.1         | 0.43    | Cell division cycle 42                                                                              |
| SEC13     | -1.1        | 0.07    | 2.0         | 0.48    | SEC13 homolog (S. cerevisiae)                                                                       |
| RABA4     | -1.3        | 0.08    | 2.0         | 0.11    | RABA4, member RAS oncogene family                                                                   |
| ACACA     | -1.3        | 0.00    | 2.0         | 0.26    | Acetyl-CoA carboxylase alpha                                                                        |
| PICALM    | 1.5         | 0.07    | 2.0         | 0.29    | Phosphatidylinositol binding clathrin assembly protein                                              |
| WAS       | -1.5        | 0.04    | 2.0         | 0.22    | Wiskott-Aldrich syndrome                                                                            |
| AP-1B1    | -1.9        | 0.09    | 2.0         | 0.54    | Adaptor-related protein complex 1, beta 1 subunit                                                   |
| MAMDC2    | -1.4        | 0.00    | 2.0         | 0.05    | Mitogen-activated protein kinase kinase kinase 2                                                    |
| AP1M2     | 1.0         | 0.02    | 1.9         | 0.30    | Adaptor-related protein complex 1, mu 2 subunit                                                     |
| STAU1     | 1.2         | 0.01    | 1.9         | 0.04    | Staufen double-stranded RNA binding protein 1                                                       |
| NSF       | 0.0         | 1.48    | 1.9         | 0.22    | N-ethylmaleimide-sensitive factor                                                                   |
| VAPB      | -1.4        | 0.05    | 1.9         | 0.30    | VAMP (vesicle-associated membrane protein)-associated protein B and C                               |
| ARPC4     | -1.0        | 0.05    | 1.9         | 0.27    | Actin related protein 2/3 complex, subunit 4, 20kDa                                                 |
| RAB8B     | -1.8        | 0.20    | 1.9         | 0.69    | RAB8B, member RAS oncogene family                                                                   |
| PK63      | -1.7        | 0.18    | 1.8         | 0.17    | Protein kinase 63                                                                                   |
| EZR       | -1.4        | 0.27    | 1.8         | 0.89    | Ezrin                                                                                               |
| PITPNM1   | -1.9        | 0.12    | 1.8         | 0.17    | Phosphatidylinositol transfer protein, membrane-associated 1                                        |
| NEEDL     | 1.3         | 0.01    | 1.8         | 0.10    | Neural precursor cell expressed, developmentally down-regulated 4-like, E3 ubiquitin protein ligase |
| TNK       | -1.7        | 0.26    | 1.8         | 0.25    | TRAF2 and NCK interacting kinase                                                                    |
| CAV1      | -1.1        | 0.01    | 1.8         | 0.20    | Caveolin 1, caveolae protein, 22kDa                                                                 |
| ARPC5     | -1.0        | 0.00    | 1.7         | 0.54    | Actin related protein 2/3 complex, subunit 5, 16kDa                                                 |
| MAP1LC3A  | -1.5        | 0.12    | 1.7         | 0.68    | Mitochondria-associated protein 1 light chain 3 alpha                                               |
| LMK1      | 1.1         | 0.05    | 1.7         | 0.34    | LM domain kinase 1                                                                                  |
| RABA5A    | -1.1        | 0.03    | 1.6         | 0.25    | RABA5A, member RAS oncogene family                                                                  |
| PAK1      | -2.8        | 0.56    | 1.6         | 0.04    | p21 protein (Cdc42/Rac1)-activated kinase 1                                                         |
| DNM2      | -0.2        | 1.65    | 1.6         | 0.28    | Dynamins 2                                                                                          |
| CAV3      | -1.2        | 0.06    | 1.6         | 0.43    | Caveolin 3                                                                                          |
| MAPK9B3   | 0.0         | 1.54    | 1.5         | 0.35    | Mitogen-activated protein kinase 8 interacting protein 3                                            |
| ARPC1     | 0.0         | 1.48    | 1.5         | 0.18    | Adaptor-related protein complex 3, delta 1 subunit                                                  |
| SNX1      | -1.2        | 0.12    | 1.5         | 0.12    | Sorting nexin 1                                                                                     |
| ARPC2     | -1.1        | 0.01    | 1.5         | 0.46    | Actin related protein 2/3 complex, subunit 2, 34kDa                                                 |
| ITSN2     | -3.1        | 0.27    | 1.4         | 0.15    | Intersectin 2                                                                                       |
| HGS       | -1.7        | 0.03    | 1.4         | 0.11    | Hepatocyte growth factor-regulated tyrosine kinase substrate                                        |
| AP2A2     | -2.0        | 0.04    | 1.4         | 0.14    | Adaptor-related protein complex 2, alpha 2 subunit                                                  |
| SYN1      | -1.4        | 0.14    | 1.3         | 0.13    | Synaptotagmin 1                                                                                     |
| GIT1      | 1.3         | 0.08    | 1.3         | 0.02    | G protein-coupled receptor kinase interacting ArGAP 1                                               |
| PDCD6P    | -1.5        | 0.15    | 1.3         | 0.21    | Programmed cell death 6 interacting protein                                                         |
| SREBF1    | -1.3        | 0.31    | 1.3         | 0.06    | Steroid regulatory element binding transcription factor 1                                           |
| CBLC      | -1.3        | 0.03    | 1.3         | 0.01    | Cell proto-oncogene C, E3 ubiquitin protein ligase                                                  |
| RABA8A    | -1.2        | 0.06    | 1.2         | 0.06    | RABA8A, member RAS oncogene family                                                                  |
| EPN3      | -1.3        | 0.01    | 1.2         | 0.24    | Epsin 3                                                                                             |
| GORASP1   | 1.1         | 0.00    | 1.2         | 0.00    | Golgi reassembly stacking protein 1, 69kDa                                                          |
| APAE1     | -2.3        | 0.08    | 1.2         | 0.21    | Adaptor-related protein complex 4, epsilon 1 subunit                                                |
| CB1       | -2.2        | 0.20    | 1.1         | 0.06    | Calcium and integrin binding 1 (calmyrin)                                                           |
| HP1       | -2.0        | 0.16    | 1.1         | 0.01    | Huntingtin interacting protein 1                                                                    |
| CBL       | -1.7        | 0.32    | 1.1         | 0.05    | Cell proto-oncogene, E3 ubiquitin protein ligase                                                    |
| CEB2      | -1.3        | 0.27    | 1.1         | 0.08    | Calcium and integrin binding family member 2                                                        |
| AP2M1     | -1.3        | 0.09    | 1.1         | 0.05    | Adaptor-related protein complex 2, mu 1 subunit                                                     |
| ARPC3     | -2.4        | 0.02    | 0.2         | 1.75    | Actin related protein 2/3 complex, subunit 3, 21kDa                                                 |
| CAH2      | -0.0        | 0.23    | 0.1         | 1.80    | Caveolin 2                                                                                          |
| PACSN1    | -1.1        | 0.03    | 0.1         | 1.68    | Protein kinase C and casein kinase substrate in neurons 1                                           |
| CTBP1     | -2.4        | 1.01    | 0.1         | 1.79    | C-terminal binding protein 1                                                                        |
| HIPR1     | -1.5        | 0.31    | 0.1         | 1.83    | Huntingtin interacting protein 1 related                                                            |
| EPH3A1    | -2.4        | 0.19    | 0.1         | 1.88    | Epidermal growth factor receptor pathway substrate 15-like 1                                        |
| PRKD1     | -2.3        | 0.84    | 0.1         | 1.70    | Protein kinase D1                                                                                   |
| ARFP2     | -1.1        | 0.03    | 0.0         | 1.54    | ADP-ribosylation factor interacting protein 2                                                       |
| FASN      | -2.5        | 1.48    | 0.0         | 1.47    | Fatty acid synthase                                                                                 |
| CFL1      | -1.4        | 0.42    | 0.0         | 1.72    | Cofilin 1 (non-muscle)                                                                              |
| SYT1      | -1.1        | 0.04    | 0.0         | 1.67    | Synaptotagmin I                                                                                     |
| VAV2      | -1.5        | 0.12    | 0.0         | 1.49    | VAV 2 guanine nucleotide exchange factor                                                            |
| CLTA      | -1.8        | 0.17    | -0.1        | 1.66    | Clahtin, light chain A                                                                              |
| PACSN3    | -2.7        | 1.18    | -0.1        | 2.65    | Protein kinase C and casein kinase substrate in neurons 3                                           |
| RABA3A    | 1.1         | 0.04    | -0.1        | 1.63    | RABA3A, member RAS oncogene family                                                                  |
| RABA4A    | -1.4        | 0.04    | -0.1        | 1.73    | RABA4A, member RAS oncogene family                                                                  |
| ARF1      | -1.3        | 0.02    | -0.2        | 1.71    | ADP-ribosylation factor 1                                                                           |
| DNM1      | -1.6        | 0.04    | -0.4        | 1.97    | Dynamins 1                                                                                          |
| MAPK9B2   | -1.9        | 0.49    | -0.6        | 2.67    | Mitogen-activated protein kinase 8 interacting protein 2                                            |
| ADAM10    | -1.2        | 0.19    | -1.0        | 3.22    | ADAM metalloproteinase domain 10                                                                    |
| ARF5      | -1.2        | 0.10    | -1.1        | 0.01    | ADP-ribosylation factor 5                                                                           |
| CD81      | -0.1        | 1.60    | -1.3        | 0.15    | CD81 molecule                                                                                       |
| EPS       | -1.4        | 0.16    | -1.3        | 0.34    | Embryonal Fyn-associated substrate                                                                  |
| RAB8B     | -1.3        | 0.17    | -1.3        | 0.07    | RAB8B, member RAS oncogene family                                                                   |
| CLTC      | 0.0         | 1.47    | -1.4        | 0.38    | Clahtin, heavy chain (Hc)                                                                           |
| RAB11FPP1 | 1.2         | 0.04    | -1.5        | 0.18    | RAB11 family interacting protein 5 (class I)                                                        |
| RAB1A     | -1.7        | 0.02    | -1.5        | 0.10    | RAB1A, member RAS oncogene family                                                                   |
| CAMK1     | -1.3        | 0.06    | -1.5        | 0.34    | Calcium/calmodulin-dependent protein kinase I                                                       |
| WASF2     | -1.7        | 0.10    | -1.5        | 0.67    | WAS protein family, member 2                                                                        |
| GNB2L1    | -1.8        | 0.01    | -1.6        | 0.51    | Guanine nucleotide binding protein (G protein), beta polypeptide 2-like 1                           |
| RAB2C     | -1.3        | 0.05    | -1.6        | 0.08    | RAB2C, member RAS oncogene family                                                                   |
| EPN1      | -1.5        | 0.16    | -1.6        | 0.88    | Epsin 1                                                                                             |
| RAB8B     | -2.4        | 1.60    | -1.7        | 3.86    | RAB8B, member RAS oncogene family                                                                   |
| AP2A1     | -2.5        | 0.60    | -1.7        | 0.19    | Adaptor-related protein complex 2, alpha 1 subunit                                                  |
| ARF3      | -1.9        | 0.03    | -1.7        | 0.50    | ADP-ribosylation factor 3                                                                           |
| CLTB      | -0.1        | 1.52    | -1.7        | 0.51    | Clahtin, light chain B                                                                              |
| PPP9K1A   | -1.6        | 0.03    | -1.9        | 0.54    | Phosphatidylinositol-4-phosphate 5-kinase, type I, alpha                                            |
| EPN2      | -1.6        | 0.57    | -2.1        | 1.26    | Epsin 2                                                                                             |
| SYN2      | -1.2        | 0.04    | -2.2        | 0.69    | Synaptotagmin 2                                                                                     |
| SNAP91    | -3.6        | 0.13    | -2.5        | 0.08    | Synaptosomal-associated protein, 91kDa                                                              |
| SAR1A     | -1.1        | 0.09    | -2.6        | 0.31    | Secretion associated, RAS related GTPase 1A                                                         |
| RABA5A    | -1.2        | 0.06    | -2.6        | 1.09    | RABA5A, member RAS oncogene family                                                                  |
| SHOGLB1   | -1.9        | 0.08    | -2.6        | 0.91    | SH3-domain GRB2-like endophilin B1                                                                  |
| PHK2B     | -6.3        | 0.45    | -2.8        | 0.94    | Phosphatidylinositol 4-kinase type 2 beta                                                           |
| ARRB2     | 0.0         | 1.57    | -2.9        | 1.60    | Arrestin, beta 2                                                                                    |
| RAC1      | -1.4        | 0.24    | -3.3        | 2.01    | RAS-related C3 botulinum toxin substrate 1 (Rho family, small GTP binding protein Rac1)             |
| RAB11A    | -1.5        | 0.04    | -3.4        | 1.55    | RAB11A, member RAS oncogene family                                                                  |
| CBL       | -5.1        | 0.11    | -3.6        | 0.76    | Cell proto-oncogene B, E3 ubiquitin protein ligase                                                  |
| ATG9      | -1.6        | 0.16    | -3.6        | 0.96    | Autophagy related 9                                                                                 |
| ARRB1     | -2.4        | 0.10    | -3.6        | 0.58    | Arrestin, beta 1                                                                                    |
| AP1M1     | -2.2        | 0.04    | -4.2        | 1.61    | Adaptor-related protein complex 1, mu 1 subunit                                                     |
| CLNT1     | -1.8        | 0.13    | -4.8        | 0.60    | Clahtin interactor 1                                                                                |
| BN1       | -1.1        | 0.08    | -4.9        | 0.72    | Bridging integrator 1                                                                               |
| ATM       | -1.5        | 0.20    | -5.7        | 0.82    | ATM serine/threonine kinase                                                                         |
| WASF3     | -2.0        | 0.55    | -6.1        | 6.81    | WAS protein family, member 3                                                                        |
| VPS3A     | 1.1         | 0.01    | -6.4        | 0.71    | Vesicular protein sorting 4 homolog A (S. cerevisiae)                                               |
| DAB2      | -3.1        | 0.38    | -6.6        | 2.48    | Dab, mitogen-responsive phosphoprotein, homolog 2 (Drosophila)                                      |
| ITSN1     | -1.8        | 0.27    | -6.9        | 2.09    | Intersectin 1 (SH3 domain protein)                                                                  |
| RAB4B     | -1.3        | 0.09    | -7.1        | 2.29    | RAB4B, member RAS oncogene family                                                                   |
| FYN       | -4.1        | 1.98    | -7.9        | 4.79    | FYN proto-oncogene, Src family tyrosine kinase                                                      |
| ASAP2     | -1.6        | 0.37    | -9.3        | 0.42    | ARFAP with SH3 domain, ankyrin repeat and PH domain 2                                               |
| PKC3ZG    | -2.0        | 0.83    | -9.4        | 3.34    | Phosphatidylinositol-4-phosphate 3-kinase, catalytic subunit type 2 gamma                           |
| VPS3B     | -3.0        | 0.36    | -9.6        | 0.18    | Vesicular protein sorting 4 homolog B (S. cerevisiae)                                               |
| ERC1      | 0.0         | 1.50    | -11.3       | 0.30    | ELKS/RAB-interacting/CAST family member 1                                                           |
| COPA      | -1.6        | 0.07    | -12.2       | 0.44    | Cotasterin protein complex, subunit alpha                                                           |
| ATP9VBC   | -1.5        | 0.10    | -12.3       | 0.34    | ATPase, H+ transporting, lysosomal 10kDa, V0 subunit c                                              |
| COPB2     | -2.0        | 0.25    | -12.3       | 0.30    | Cotasterin protein complex, subunit beta 2 (beta prime)                                             |
| VCP       | -4.3        | 0.70    | -12.4       | 0.49    | Valosin containing protein                                                                          |
