# Supplementary material for: Identification of Host Factors Involved in Human Cytomegalovirus Replication, Assembly, and Egress Using a Two-Step Small Interfering RNA Screen
Source: PubMed Central journal article supplement (PMC6020295; doi:10.1128/mbio.00716-18), 2018-06-26
Supplement: mbo003183951st3.pdf [file mbo003183951st3.pdf]

| Gene     | PR          |         | VP          |         | VP / PR | Significance | Description                                                                                            |
|----------|-------------|---------|-------------|---------|---------|--------------|--------------------------------------------------------------------------------------------------------|
|          | Fold change | Std dev | Fold change | Std dev |         |              |                                                                                                        |
| ERC1     | 0.0         | 1.50    | -11.3       | 0.30    | 0.1     | 0.009        | ** ELKS/RAB6-interacting/CAS1 family member 1                                                          |
| RAB4B    | 1.3         | 0.37    | -7.1        | 2.29    | 0.1     | 0.036        | * RAB4B, member RAS oncogene family                                                                    |
| ATP9VC   | -1.5        | 0.10    | -12.3       | 0.34    | 0.1     | 0.001        | ** ATPase, H <sup>+</sup> transporting, lysosomal 10kDa, V0 subunit c                                  |
| COP5A    | 1.6         | 0.07    | -12.2       | 0.44    | 0.1     | 0.001        | *** Coatamer protein complex, subunit alpha                                                            |
| VPS4A    | 1.1         | 0.01    | -6.4        | 0.71    | 0.1     | 0.004        | ** Vacuolar protein sorting 4 homolog A (S. cerevisiae)                                                |
| COPB2    | -2.0        | 0.25    | -12.3       | 0.30    | 0.2     | 0.001        | *** Coatamer protein complex, subunit beta 2 (beta prime)                                              |
| ASAP2    | -1.6        | 0.37    | -9.3        | 0.42    | 0.2     | 0.003        | ** ARHGAP with SH3 domain, ankyrin repeat and PH domain 2                                              |
| PKCZG    | -2.0        | 0.83    | -9.4        | 3.04    | 0.2     | 0.052        | ** Phosphatidylinositol-4-phosphate 3-kinase, catalytic subunit type 2 gamma                           |
| BN1      | -1.1        | 0.08    | -4.9        | 0.72    | 0.2     | 0.018        | ** Bridging integrator 1                                                                               |
| ATM      | -1.5        | 0.20    | -5.7        | 0.82    | 0.3     | 0.020        | * ATM serine/threonine kinase                                                                          |
| ITSN1    | -1.8        | 0.27    | -6.9        | 2.09    | 0.3     | 0.077        | ** Intersectin 1 (SH3 domain protein)                                                                  |
| VPS3B    | -3.0        | 0.30    | -10.4       | 1.19    | 0.3     | 0.001        | ** Vacuolar protein sorting 36 homolog (S. cerevisiae)                                                 |
| AP1M1    | -1.2        | 0.04    | -4.2        | 1.61    | 0.3     | 0.122        | ** Adaptor-related protein complex 1, mu 1 subunit                                                     |
| VCP      | -4.3        | 0.70    | -12.4       | 0.49    | 0.3     | 0.006        | ** Valosin containing protein                                                                          |
| CLINT1   | -1.8        | 0.13    | -4.8        | 0.60    | 0.4     | 0.021        | ** Clathrin interactor 1                                                                               |
| ARRB2    | 0.0         | 1.57    | -2.9        | 1.93    | 0.4     | 0.234        | ** Arrestin, beta 2                                                                                    |
| SAR1A    | -1.1        | 0.09    | -2.5        | 0.31    | 0.5     | 0.027        | * Secretion associated, RAS related GTPase 1A                                                          |
| ATG5     | -1.6        | 0.16    | -3.6        | 0.96    | 0.5     | 0.108        | ** Autophagy related 5                                                                                 |
| RAB11A   | -1.5        | 0.04    | -3.4        | 1.55    | 0.5     | 0.228        | ** RAB11A, member RAS oncogene family                                                                  |
| DBP2     | -3.1        | 0.36    | -6.6        | 2.46    | 0.5     | 0.165        | ** Dbp, mitogen-responsive phosphoprotein, homolog 2 (Drosophila)                                      |
| RAC1     | -1.4        | 0.24    | -3.3        | 2.01    | 0.5     | 0.305        | ** RAS-related C3 botulinum toxin substrate 1 (Rho family, small GTP binding protein Rac1)             |
| RAB6A    | -1.2        | 0.08    | -2.5        | 1.09    | 0.5     | 0.216        | ** RAB6A, member RAS oncogene family                                                                   |
| FYN      | -4.1        | 1.98    | -7.9        | 4.79    | 0.6     | 0.403        | ** FYN proto-oncogene, Src family tyrosine kinase                                                      |
| STN2     | -1.2        | 0.04    | -1.5        | 0.68    | 0.6     | 0.170        | ** Synaptojanin 2                                                                                      |
| RAB11FP5 | 1.2         | 0.04    | -1.5        | 0.18    | 0.6     | 0.002        | ** RAB11 family interacting protein 5 (class I)                                                        |
| CLTB     | -0.1        | 1.52    | -1.7        | 0.51    | 0.6     | 0.282        | ** Clathrin, light chain B                                                                             |
| ARRB1    | -2.4        | 0.10    | -3.6        | 0.58    | 0.7     | 0.096        | ** Arrestin, beta 1                                                                                    |
| CLTC     | 0.0         | 1.47    | -1.4        | 0.38    | 0.7     | 0.324        | ** Clathrin, heavy chain (Hc)                                                                          |
| SH3GLB1  | -1.9        | 0.08    | -2.6        | 0.91    | 0.8     | 0.356        | ** SH3-domain GRB2-like endophilin B1                                                                  |
| WASF3    | -2.0        | 0.55    | -6.1        | 6.81    | 0.8     | 0.481        | ** WAS protein family, member 3                                                                        |
| RAB3A    | -1.1        | 0.04    | -0.1        | 1.63    | 0.8     | 0.397        | ** RAB3A, member RAS oncogene family                                                                   |
| RAB5C    | -1.3        | 0.05    | -1.6        | 0.08    | 0.8     | 0.063        | ** RAB5C, member RAS oncogene family                                                                   |
| CSN1     | -0.1        | 1.60    | -1.3        | 1.15    | 0.8     | 0.406        | ** CSN1 molecule                                                                                       |
| SYT1     | 1.1         | 0.04    | 0.0         | 1.67    | 0.9     | 0.425        | ** Synaptotagmin I                                                                                     |
| CAMK1    | -1.3        | 0.06    | -1.5        | 0.34    | 0.9     | 0.437        | ** Calcium/calmodulin-dependent protein kinase I                                                       |
| ADAM10   | -1.2        | 0.19    | -1.0        | 3.22    | 0.9     | 0.964        | ** ADAM metalloprotease domain 10                                                                      |
| CLB2     | -3.1        | 0.05    | -1.2        | 0.50    | 1.0     | 0.455        | ** Clb proto-oncogene B, E3 ubiquitin protein ligase                                                   |
| PSK1A    | -1.6        | 0.03    | -1.9        | 0.54    | 0.9     | 0.519        | ** Phosphatidylinositol-4-phosphate 5-kinase, type L alpha                                             |
| EPN2     | -1.6        | 0.57    | -2.1        | 1.26    | 0.9     | 0.693        | ** Epsin 2                                                                                             |
| ARFP2    | 1.1         | 0.03    | 0.0         | 1.54    | 0.9     | 0.432        | ** ADP-ribosylation factor interacting protein 2                                                       |
| RAB6B    | -1.3        | 0.17    | -1.3        | 0.07    | 1.0     | 0.762        | ** RAB6B, member RAS oncogene family                                                                   |
| GIT1     | 1.3         | 0.08    | 1.3         | 0.02    | 1.0     | 0.684        | ** G protein-coupled receptor kinase interacting ARGAP 1                                               |
| EPN1     | -1.5        | 0.16    | -1.6        | 0.68    | 1.1     | 0.923        | ** Epsin 1                                                                                             |
| EFS      | -1.4        | 0.16    | -1.3        | 0.34    | 1.1     | 0.865        | ** Embryonal Fyn-associated substrate                                                                  |
| COXASP1  | 1.1         | 0.00    | 1.2         | 0.00    | 1.1     | 0.001        | ** Coaxially stacked protein 1, 65kDa                                                                  |
| ARF5     | -1.2        | 0.10    | -1.1        | 0.01    | 1.1     | 0.237        | ** ADP-ribosylation factor 5                                                                           |
| ARF1     | -1.3        | 0.02    | -0.2        | 1.71    | 1.1     | 0.452        | ** ADP-ribosylation factor 1                                                                           |
| RAB1A    | -1.7        | 0.02    | -1.5        | 0.10    | 1.1     | 0.098        | ** RAB1A, member RAS oncogene family                                                                   |
| ARF3     | -1.9        | 0.03    | -1.7        | 0.50    | 1.2     | 0.050        | ** ADP-ribosylation factor 3                                                                           |
| RAB5B    | -2.4        | 1.60    | -1.7        | 3.86    | 1.2     | 0.830        | ** RAB5B, member RAS oncogene family                                                                   |
| WASF2    | -1.7        | 0.10    | -1.5        | 0.67    | 1.2     | 0.771        | ** WAS protein family, member 2                                                                        |
| PACSB1   | -1.1        | 0.03    | 0.1         | 1.68    | 1.2     | 0.415        | ** Protein kinase C and casein kinase substrate in neurons 1                                           |
| DNM1     | -1.8        | 0.04    | -1.4        | 1.97    | 1.2     | 0.487        | ** Dynamin 1                                                                                           |
| ONS1     | -1.8        | 0.01    | -1.6        | 0.51    | 1.2     | 0.516        | ** Guanine nucleotide binding protein (G protein), beta polypeptide 2-like 1                           |
| RAB2A    | -1.4        | 0.04    | -0.1        | 1.73    | 1.3     | 0.417        | ** RAB2A, member RAS oncogene family                                                                   |
| ARPC2    | 1.1         | 0.01    | 1.5         | 0.46    | 1.3     | 0.384        | ** Actin related protein 2/3 complex, subunit 2, 34kDa                                                 |
| CLF1     | -1.4        | 0.42    | 0.0         | 1.73    | 1.3     | 0.367        | ** Cliflin 1 (non-muscle)                                                                              |
| PICALM   | 1.5         | 0.07    | 2.0         | 0.29    | 1.4     | 0.128        | ** Phosphatidylinositol binding clathrin assembly protein                                              |
| NEDD4L   | 1.3         | 0.01    | 1.8         | 0.19    | 1.4     | 0.066        | ** Neural precursor cell expressed, developmentally down-regulated 4-like, E3 ubiquitin protein ligase |
| CIB2     | -1.3        | 0.27    | 1.1         | 0.08    | 1.4     | 0.007        | ** Calcium and integrin binding family member 2                                                        |
| AP2M1    | -1.3        | 0.09    | 1.1         | 0.05    | 1.4     | 0.001        | ** Adaptor-related protein complex 2, mu 1 subunit                                                     |
| VAV2     | -1.5        | 0.12    | 1.2         | 0.49    | 1.4     | 0.307        | ** VAV 2 guanine nucleotide exchange factor                                                            |
| RAB8A    | -1.2        | 0.06    | 1.2         | 0.06    | 1.4     | 0.001        | ** RAB8A, member RAS oncogene family                                                                   |
| CLTCL1   | 1.5         | 0.07    | 2.1         | 0.22    | 1.4     | 0.058        | ** Clathrin, heavy chain-like 1                                                                        |
| SNAP91   | -3.6        | 0.13    | -2.5        | 0.08    | 1.4     | 0.010        | ** Synaptoosomal-associated protein, 91kDa                                                             |
| MAPK8IP3 | 0.0         | 1.54    | 1.5         | 0.15    | 1.5     | 0.316        | ** Mitogen-activated protein kinase 8 interacting protein 3                                            |
| AP3D1    | 0.0         | 1.46    | 1.5         | 0.18    | 1.5     | 0.287        | ** Adaptor-related protein complex 3, delta 1 subunit                                                  |
| AP2A1    | -2.5        | 0.00    | -1.7        | 0.19    | 1.5     | 0.026        | ** Adaptor-related protein complex 2, alpha 1 subunit                                                  |
| SREBF1   | -1.3        | 0.31    | 1.3         | 0.06    | 1.6     | 0.008        | ** Sterol regulatory element binding transcription factor 1                                            |
| LRK1     | -1.1        | 0.05    | 1.7         | 0.04    | 1.6     | 0.124        | ** LIM domain kinase 1                                                                                 |
| EPN3     | -1.3        | 0.01    | 1.2         | 0.24    | 1.6     | 0.004        | ** Epsin 3                                                                                             |
| MAPK8IP2 | -1.9        | 0.49    | -0.6        | 2.67    | 1.6     | 0.557        | ** Mitogen-activated protein kinase 8 interacting protein 2                                            |
| HIP1R    | -1.5        | 0.31    | 0.1         | 1.83    | 1.6     | 0.355        | ** Huntingtin interacting protein 1 related                                                            |
| CLBC     | -1.3        | 0.03    | 1.7         | 0.50    | 1.6     | 0.050        | ** Clb proto-oncogene C, E3 ubiquitin protein ligase                                                   |
| AP2B1    | 1.6         | 0.05    | 2.6         | 0.55    | 1.6     | 0.126        | ** Adaptor-related protein complex 2, beta 1 subunit                                                   |
| CLTA     | -1.8        | 0.17    | -0.1        | 1.66    | 1.6     | 0.294        | ** Clathrin, light chain A                                                                             |
| STAU1    | 1.2         | 0.01    | 1.9         | 0.04    | 1.6     | 0.001        | ** Staufen double-stranded RNA binding protein 1                                                       |
| RDC1     | -1.6        | 0.02    | 1.8         | 0.02    | 1.7     | 0.027        | ** Rho-associated, coiled-coil containing protein kinase 1                                             |
| RAB5A    | -1.1        | 0.03    | 1.6         | 0.25    | 1.7     | 0.004        | ** RAB5A, member RAS oncogene family                                                                   |
| SNX1     | -1.2        | 0.12    | 1.5         | 0.12    | 1.7     | 0.002        | ** Sorting nexin 1                                                                                     |
| ARPC5    | -1.0        | 0.00    | 1.7         | 0.54    | 1.8     | 0.019        | ** Actin related protein 2/3 complex, subunit 5, 16kDa                                                 |
| RAB5C    | 1.5         | 0.11    | 1.6         | 0.17    | 1.8     | 0.115        | ** RAB5C, member RAS oncogene family                                                                   |
| DNM2     | -0.2        | 1.85    | 1.6         | 0.28    | 1.8     | 0.277        | ** Dynamin 2                                                                                           |
| AP1M2    | 1.0         | 0.02    | 1.9         | 0.30    | 1.9     | 0.053        | ** Adaptor-related protein complex 1, mu 2 subunit                                                     |
| RHOA     | 1.3         | 0.06    | 2.5         | 0.35    | 1.9     | 0.045        | ** RAS homolog family member A                                                                         |
| RABD1    | 1.3         | 0.00    | 2.5         | 0.39    | 1.9     | 0.050        | ** RABD1, member RAS oncogene family                                                                   |
| RAB7B    | -1.3        | 0.01    | 2.1         | 0.39    | 1.9     | 0.034        | ** RAB7B, member RAS oncogene family                                                                   |
| PCDDIP   | -1.5        | 0.15    | 1.3         | 0.21    | 1.9     | 0.004        | ** Programmed cell death 6 interacting protein                                                         |
| SYNJ1    | -1.4        | 0.14    | 1.3         | 0.13    | 1.9     | 0.002        | ** Synaptojanin 1                                                                                      |
| NSF      | 0.0         | 1.48    | 1.9         | 0.22    | 1.9     | 0.217        | ** N-ethylmaleimide-sensitive factor                                                                   |
| CAV3     | -1.2        | 0.02    | 1.6         | 0.43    | 1.9     | 0.012        | ** Caveolin 3                                                                                          |
| CBL      | -1.7        | 0.32    | 1.1         | 0.05    | 1.9     | 0.006        | ** Cbl proto-oncogene, E3 ubiquitin protein ligase                                                     |
| ARPC4    | -1.0        | 0.05    | 1.9         | 0.27    | 2.0     | 0.004        | ** Actin related protein 2/3 complex, subunit 4, 20kDa                                                 |
| TSG101   | 1.2         | 0.10    | 2.4         | 0.47    | 2.0     | 0.073        | ** Tumor susceptibility 101                                                                            |
| PKA2B    | -5.3        | 0.45    | 2.0         | 0.94    | 2.0     | 0.080        | ** Phosphatidylinositol 4-kinase type 2 beta                                                           |
| CAV1     | -1.1        | 0.01    | 1.8         | 0.20    | 2.0     | 0.002        | ** Caveolin 1, caveolae protein, 22kDa                                                                 |
| SNX2     | 0.1         | 1.84    | 2.2         | 0.07    | 2.0     | 0.207        | ** Sorting nexin 2                                                                                     |
| CYTH3    | 1.2         | 0.11    | 2.4         | 0.46    | 2.1     | 0.063        | ** Cytohesin 3                                                                                         |
| FASN     | -2.5        | 1.49    | 0.0         | 1.47    | 2.1     | 0.229        | ** Fatty acid synthase                                                                                 |
| PHK2A    | 0.0         | 1.64    | 2.3         | 0.66    | 2.2     | 0.209        | ** Phosphatidylinositol 4-kinase type 2 alpha                                                          |
| SEC13    | -1.1        | 0.07    | 2.0         | 0.48    | 2.3     | 0.011        | ** SEC13 homolog (S. cerevisiae)                                                                       |
| CAV2     | -2.0        | 0.23    | 0.1         | 1.80    | 2.3     | 0.238        | ** Caveolin 2                                                                                          |
| HIP1     | -1.8        | 0.16    | 1.1         | 0.16    | 2.3     | 0.001        | ** Huntingtin interacting protein 1                                                                    |
| PRK01    | -2.3        | 0.84    | 0.1         | 1.70    | 2.3     | 0.222        | ** Protein kinase D1                                                                                   |
| DNM3     | 1.1         | 0.03    | 2.5         | 0.63    | 2.3     | 0.085        | ** Dynamin 3                                                                                           |
| HGS      | -1.7        | 0.03    | 1.4         | 0.11    | 2.3     | 0.001        | ** Hepatocyte growth factor-regulated tyrosine kinase substrate                                        |
| ATG12    | 0.0         | 1.49    | 2.4         | 0.36    | 2.3     | 0.163        | ** Autophagy related 12                                                                                |
| AMPH     | 1.1         | 0.05    | 2.5         | 0.50    | 2.4     | 0.054        | ** Amphiphysin                                                                                         |
| EEA1     | -1.1        | 0.06    | 2.3         | 0.40    | 2.4     | 0.007        | ** Early endosome antigen 1                                                                            |
| EPH5     | 0.1         | 1.62    | 2.7         | 0.48    | 2.4     | 0.163        | ** Epidermal growth factor receptor pathway substrate 15                                               |
| CTBP1    | -2.4        | 0.01    | 0.1         | 1.79    | 2.4     | 0.229        | ** C-terminal binding protein 1                                                                        |
| CBI      | -2.2        | 0.20    | 1.1         | 0.06    | 2.4     | 0.002        | ** Calcium and integrin binding 1 (calmyrin)                                                           |
| BECN1    | -1.2        | 0.11    | 2.1         | 0.41    | 2.5     | 0.008        | ** Beclin 1, autophagy related                                                                         |
| VAPA     | -1.1        | 0.12    | 2.2         | 0.10    | 2.5     | 0.001        | ** VAMP (vesicle-associated membrane protein)-associated protein A, 33kDa                              |
| NEDD4    | -1.2        | 0.19    | 2.1         | 0.09    | 2.5     | 0.002        | ** Neural precursor cell expressed, developmentally down-regulated 4, E3 ubiquitin protein ligase      |
| RAB4A    | -1.3        | 0.08    | 2.0         | 0.11    | 2.6     | 0.001        | ** RAB4A, member RAS oncogene family                                                                   |
| MAP1LC3A | -1.5        | 0.12    | 1.7         | 0.68    | 2.6     | 0.022        | ** Microtubule-associated protein 1 light chain 3 alpha                                                |
| EPH5L1   | -2.4        | 0.19    | 0.1         | 1.88    | 2.6     | 0.210        | ** Epidermal growth factor receptor pathway substrate 15-like 1                                        |
| EZR      | -1.4        | 0.27    | 1.8         | 0.69    | 2.6     | 0.025        | ** Etrin                                                                                               |
| RAB5B    | -1.2        | 0.08    | 2.2         | 0.16    | 2.6     | 0.001        | ** RAB5B, member RAS oncogene family                                                                   |
| ACTR2    | -0.1        | 1.60    | 2.4         | 0.28    | 2.6     | 0.163        | ** ARP2 actin-related protein 2 homolog (yeast)                                                        |
| ACTR3    | -1.1        | 0.07    | 2.4         | 0.53    | 2.6     | 0.011        | ** ARP3 actin-related protein 3 homolog (yeast)                                                        |
| ACACA    | -1.3        | 0.09    | 2.0         | 0.26    | 2.6     | 0.003        | ** Acetyl-CoA carboxylase alpha                                                                        |
| SYT2     | -1.1        | 0.12    | 2.5         | 0.27    | 2.7     | 0.003        | ** Synaptotagmin II                                                                                    |
| PHKA     | -1.3        | 0.01    | 2.1         | 0.27    | 2.7     | 0.003        | ** Phosphatidylinositol 4-kinase, catalytic, alpha                                                     |
| AP2A2    | -2.0        | 0.04    | 1.4         | 0.14    | 2.7     | 0.001        | ** Adaptor-related protein complex 2, alpha 2 subunit                                                  |
| AP4E1    | -2.3        | 0.06    | 1.2         | 0.21    | 2.7     | 0.002        | ** Adaptor-related protein complex 4, epsilon 1 subunit                                                |
| VAPB     | -1.4        | 0.06    | 1.9         | 0.30    | 2.7     | 0.004        | ** VAMP (vesicle-associated membrane protein)-associated protein B and C                               |
| CIB3     | -1.2        | 0.09    | 2.3         | 0.43    | 2.7     | 0.008        | ** Calcium and integrin binding family member 3                                                        |
| RAB29    | -1.1        | 0.01    | 2.6         | 0.59    | 2.7     | 0.013        | ** RAB29, member RAS oncogene family                                                                   |
| MAPK2    | -1.4        | 0.07    | 2.0         | 0.55    | 2.7     | 0.013        | ** Mitogen-activated protein kinase kinase kinase kinase kinase 2                                      |
| PKCZG3   | -2.7        | 1.16    | 2.0         | 0.22    | 2.8     | 0.234        | ** Mitogen-activated protein kinase C and casein kinase substrate in neurons 3                         |
| PKCZG    | -1.3        | 0.01    | 2.3         | 0.37    | 2.8     | 0.006        | ** Phosphatidylinositol-4,5-bisphosphate 3-kinase, catalytic subunit gamma                             |
| GRB2     | -1.1        | 0.03    | 2.5         | 0.61    | 2.9     | 0.014        | ** Growth factor receptor-bound protein 2                                                              |
| ARPC3    | -2.4        | 0.02    | 0.2         | 1.75    | 2.9     | 0.169        | ** Actin related protein 2/3 complex, subunit 3, 21kDa                                                 |
| WAS      | -1.5        | 0.04    | 2.6         | 0.22    | 2.9     | 0.002        | ** Wiskott-Aldrich syndrome                                                                            |
| IPK3     | -1.7        | 0.18    | 1.8         | 0.17    | 3.0     | 0.003        | ** Inositol hexakisphosphate kinase 3                                                                  |
| WASF1    | -0.3        | 1.91    | 2.5         | 1.12    | 3.0     | 0.215        | ** WAS protein family, member 1                                                                        |
| TNK      | -1.7        | 0.26    | 1.8         | 0.25    | 3.0     | 0.005        | ** TRAF2 and NCK interacting kinase                                                                    |
| MAPK8IP1 | -1.2        | 0.15    | 2.1         | 0.42    | 3.1     | 0.007        | ** Mitogen-activated protein kinase 8 interacting protein 1                                            |
| RAB5B    | 1.8         | 0.20    | 1.9         | 0.69    | 3.1     | 0.019        | ** RAB5B, member RAS oncogene family                                                                   |
| SH3GLB2  | -1.2        | 0.15    | 2.8         | 0.58    | 3.3     | 0.011        | ** SH3-domain GRB2-like endophilin B2                                                                  |
| ARPC1B   | -1.4        | 0.12    | 2.3         | 0.56    | 3.4     | 0.011        | ** Actin related protein 2/3 complex, subunit 1B, 41kDa                                                |
| ARF6     | -1.4        | 0.16    | 2.4         | 0.36    | 3.4     | 0.005        | ** ADP-ribosylation factor 6                                                                           |
| PITRM1   | -1.8        | 0.12    | 1.8         | 0.17    | 3.5     | 0.002        | ** Phosphatidylinositol transfer protein, membrane-associated 1                                        |
| AP1B1    | -1.9        | 0.09    | 2.0         | 0.54    | 3.7     | 0.010        | ** Adaptor-related protein complex 1, beta 1 subunit                                                   |
| VAMP2    | -1.3        | 0.11    | 2.9         | 0.53    | 3.7     | 0.008        | ** Vesicle-associated membrane protein 2 (synaptobrevin 2)                                             |
| VAMP1    | -1.7        | 0.29    | 2.2         | 0.48    | 3.8     | 0.010        | ** Vesicle-associated membrane protein 1 (synaptobrevin 1)                                             |
| DAPH1    | -1.5        | 0.01    | 2.6         | 0.45    | 3.8     | 0.006        | ** Diaphanous-related form 1                                                                           |
| ATP9VA1  | -1.8        | 0.20    | 2.2         | 0.50    | 3.9     | 0.009        | ** ATPase, H <sup>+</sup> transporting, lysosomal V0 subunit a1                                        |
| CDC42    | -2.1        | 0.04    | 2.1         | 0.43    | 4.2     | 0.005        | ** Cell division cycle                                                                                 |
